# Supplementary material
Source: PubMed Central journal article supplement (PMC1914189)

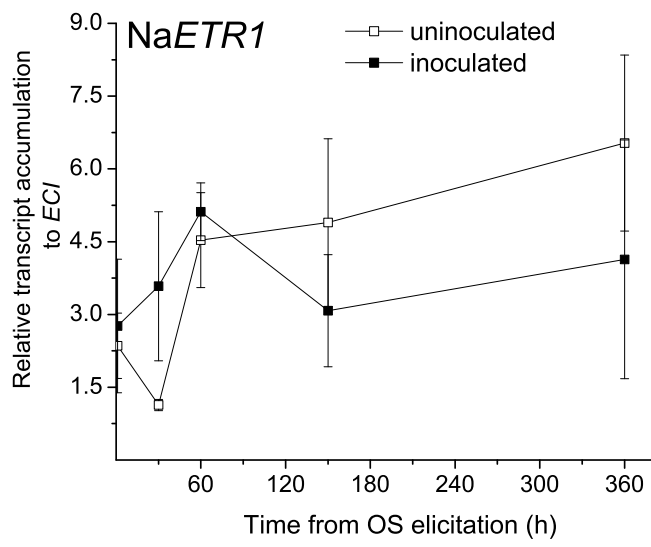

Supplement: plntphys_pp.107.097543_1.pdf [file plntphys_pp.107.097543_1.pdf]
